# Supplementary material for: Biodiversity of coral reef cryptobiota shuffles but does not decline under the combined stressors of ocean warming and acidification
Source: PubMed Central journal article supplement (PMC8488634; doi:10.1073/pnas.2103275118), 2021-09-20
Supplement: pnas.2103275118.sapp.pdf [file pnas.2103275118.sapp.pdf]

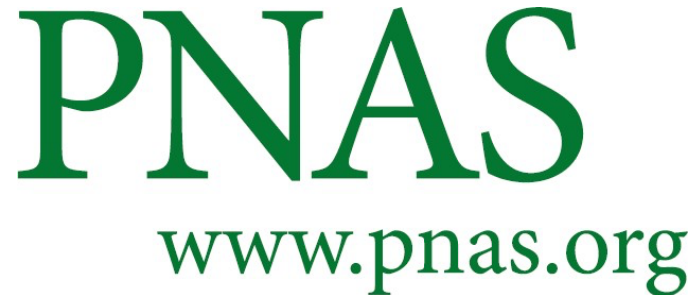

## **Supplementary Information for**

### **Biodiversity of coral reef cryptobiota shuffles but does not decline under the combined stressors of ocean warming and acidification**

Molly A. Timmers<sup>1-3</sup>, Christopher P. Jury<sup>3</sup>, Jan Vicente<sup>3</sup>, Keisha D. Bahr<sup>4</sup>, Maryann K. Webb<sup>3</sup>, Robert J. Toonen<sup>3</sup>

Molly A. Timmers  
Email: [timmers@hawaii.edu](mailto:timmers@hawaii.edu)

#### **This PDF file includes:**

Supplementary Text  
SI References  
Figures S1 to S10  
Tables S1 to S14

## Supplementary Text

### *Detailed Tank Set-up:*

A 40-tank outdoor, flow-through mesocosm system at the Hawai'i Institute of Marine Biology on Coconut Island in Kāne'ohe Bay was used to maintain experimental treatments. Unfiltered seawater pumped continuously and directly from the adjacent coral reef slope fed the fully factorial design with four treatments consisting of Control present-day and future ocean temperature and pH conditions (10 mesocosms per treatment) (Figure S1). Relative to the offshore source water, seawater temperature and chemistry are naturally modified by reef-associated physical and biogeochemical processes as the water flows through the bay. To ensure that the water temperature and chemistry of the incoming seawater was close to that of the original source water rather than altered by the reef-associated physical and biogeochemical processes, all incoming seawater was directed into a mixing tank where temperature was adjusted slightly using a commercial heat pump on a temperature controller and chemistry was marginally adjusted with small additions of 1.0 N NaOH via a peristaltic pump to achieve average present-day offshore temperature and chemistry conditions in Hawai'i (temperature ~23.5–27.5 °C, pH ~7.97–8.07, annually). These small adjustments resulted in modifications to the temperature, pH, and total alkalinity in the seawater input which, when combined with the same physical and biogeochemical processes in the mesocosms, allowed us to achieve conditions similar to those observed on the reef (1–3) and expose all in-coming larvae to the same environment prior to treatment conditioning. The water from this mixing tank was then split off into a series of header tanks where it was heated or acidified according to treatment, with 2 replicate header tanks per treatment to avoid pseudoreplication. Temperature was adjusted using commercial aquarium heaters on temperature controllers and seawater was dosed with CO<sub>2</sub> gas using high precision needle valves connected to venturi valves on aquarium pumps to deliver a precisely controlled quantity of CO<sub>2</sub> gas that was completely dissolved into the seawater in the header tanks before flowing into the mesocosms. The Heated treatments were set to remain 2 °C above the Control (i.e., present-day average) temperature, whereas the Acidified treatments were maintained at 0.2 pH units below the Control treatment, thereby replicating conditions expected at the end of the century. From the header tanks, the treated water was distributed to the respective mesocosm treatments. Water flowed continuously into each mesocosm at an inflow rate at 1.2 L min<sup>-1</sup> providing a 1 hr residence time within all mesocosms. Additional water circulation was generated within each mesocosm a Maxi-Jet Pro propeller (4900 L hr<sup>-1</sup>) seawater pump. All mesocosms experienced natural daily and seasonal fluctuations in light, seawater temperature, and carbonate chemistry with appropriate offsets according to treatment.

Two approaches were used to characterize the water temperature and chemistry in the mesocosms. First, water samples were taken from each mesocosm at 1200 hr local time once per week for total alkalinity and spectrophotometric pH, whereas salinity and temperature were measured with a YSI multimeter. All these procedures followed standard protocols (4). The precisions of these measurements were: pH ±0.002 units, salinity ±0.01 psu, temperature ±0.01 °C, total alkalinity ±7 μmol kg<sup>-1</sup>. The accuracies of

these measurements are estimated as: pH  $\pm 0.005$  units, salinity  $\pm 0.3$  psu, temperature  $\pm 0.1$  °C, total alkalinity  $\pm 7$   $\mu\text{mol kg}^{-1}$ . The accuracy and precision of total alkalinity titrations were assessed using Certified Reference Materials (CRMs) obtained from Andrew Dickson (Scripps Institution of Oceanography). Second, the temperature and chemistry measurements as described above, were assessed every 4 hr over the diel cycle once per quarter. For the remaining two months per quarter, bottle samples were taken for pH and total alkalinity only at 1200 and 0000 hr and a pH meter was used to assess pH at the other diel sampling points (1600, 2000, 0400, and 0800 hr). The pH meter was empirically calibrated to the 1200 and 0000 hr pH bottle samples at the time of collection, yielding an uncertainty of  $\pm 0.02$  units for these sample points. The monthly diel samples were used to assess the hourly temperature and chemistry variation in the mesocosms as well as the daily mean values on those sampling dates. To estimate the daily mean values from the weekly water samples, the empirically derived relationships between the offset of the mesocosm sea water to the incoming sea water measured at 1200 hr and the daily mean values (characterized during the diel sampling) were used to estimate the daily mean parameters. These estimates yielded the following uncertainties in the calculated daily means: salinity  $\pm 0.12$  psu, pH  $\pm 0.03$  units, temperature  $\pm 0.17$  °C, and total alkalinity  $\pm 16$   $\mu\text{mol kg}^{-1}$ . The remaining carbonate chemistry parameters were calculated with CO2SYS (5).

To simulate a reef environment, each mesocosm included coral rubble from the eight-dominant reef-building coral species in Hawaii (*Montipora capitata*, *Montipora flabellata*, *Montipora patula*, *Pocillopora acuta*, *Pocillopora meandrina*, *Porites compressa*, *Porites evermanni*, and *Porites lobata*), yielding an initial coral cover of roughly 10%. These coral species collectively comprise >95% of the coral cover on Hawaiian reefs (6, 7). Five herbivorous reef snails (*Trochus sp.*), a juvenile Threadfin butterflyfish (*Chaetodon auriga*), and a juvenile Convict tang (*Acanthurus triostegus*) were placed in each mesocosm. The surgeonfish is a generalist grazer on benthic algae whereas the butterflyfish is a generalist grazer on non-coral invertebrates. Together, the fish provided the essential ecological functions of herbivory and predation in the mesocosms, and at fish biomass values similar to those reported for Hawaiian reefs (8). Each mesocosm had a 2 cm layer of carbonate reef sand and gravel and pieces of reef rubble (3 replicate 10-20 cm pieces). All visible organisms were removed from the sand, gravel, and rubble which were then well mixed and randomly divided among mesocosms to avoid any sort of bias among treatments. The corals and rubble were placed on a plastic grate 5 cm above the reef sand and gravel to simulate their attachment to hard substrate in nature.

This mesocosm community was given 12 weeks to acclimate under ambient flow-through sea water before slowly adjusting the temperature and pH over the course of 20 days. Four months later, the ARMS were placed underneath the plastic grate to simulate the cryptobenthos (Fig. S2).

## Detailed Metabarcoding Processing

### *I. DNA Extraction*

Total genomic DNA from each ARMS homogenate was isolated using Powermax Soil Isolation Kit following modifications to the manufacturer's protocol (9). Amplicons of the cytochrome oxidase I gene (COI) were generated via polymerase chain reaction (PCR) in triplicate 20  $\mu$ l reaction volumes for each sample, targeting a 313 bp fragment using the primers mIColintF (5' GGW ACW GGW TGA ACW GTW TAY CCY CC 3' (10) and jgHCO2198 (5' TAI ACY TCI GGR TGI CCR AAR AAY CA 3' (11). Each 20  $\mu$ l reaction included: 7.65  $\mu$ l of nanopure H<sub>2</sub>O, 10  $\mu$ l of ImmoMix Red (2 $\times$ ; Biorline), 0.06  $\mu$ l of each primer (10  $\mu$ M), 0.15  $\mu$ l bovine serum albumin (10 mg/ml) and 1  $\mu$ l template DNA (5–25 ng  $\mu$ l<sup>-1</sup>). We used a touchdown PCR profile with 16 initial cycles: denaturation for 10 s at 95 °C, annealing for 30 s at 62 °C (-1 °C per cycle), and extension for 60 s at 72 °C, followed by 20 cycles at an annealing temperature of 46 °C (10). All PCR reactions included negative controls and PCR products were quality assessed by gel electrophoresis in agarose gel. Amplification success was defined by the presence of a clear band around 325 bp. If a band was encountered in the negative control, all associated PCR products were discarded and redone. Pooled triplicate reactions along with the negative controls were purified with Agencourt AMPure XP beads and quality assessed again by gel electrophoresis. Illumina adapters were ligated to cleaned PCR products using the Kapa Hyper-Prep PCR-free Kit and assessed by gel electrophoresis. If any of the negative controls had visible bands >100 bp, all associated samples were discarded and the PCR process and library preparation were reinitiated. Libraries were validated via qPCR using the KAPA library quantification kit and sized and checked for quality using an Agilent Technologies 2100 Bioanalyzer. Samples passing quality control were sequenced at the University of California, Riverside's Institute for Integrative Genome Biology on MiSeq platforms using v3 chemistry (2  $\times$  300 bp paired-ends).

### *II. Bioinformatics*

We used the metabarcoding R modular package pipeline *Just Another Metabarcoding Pipeline* (JAMP - <https://github.com/VascoElbrecht/JAMP>) which integrates Usearch v10.0.240 (12), Vsearch v2.4.3 (13) and Cutadapt 1.9 (14) to process all samples. In brief, preprocessing of reads included sample demultiplexing, paired-end merging (Usearch, allowing for 25% mismatches in overlap), primer trimming (Cutadapt, allowing for 10% errors in primer matching), generation of reverse complements to align reads in the forward direction (Usearch), and sequence length filtration (min/max 295/340 bp – Cutadapt; (15)). Low quality sequences were filtered and discarded using UPARSE fastq\_filter with maxee = 0.25 and qmax at 60 (16), dereplicated (min. unique size = 2), and clustered with simultaneous chimera removal using USEARCH (cluster\_otus 97% identity). The pre-processed dereplicated reads of all samples (including singletons) were matched against the respective Molecular Operational Taxonomic Units (MOTUs) with a minimum match of 97% using usearch\_global and strand plus within USEARCH. MOTUs with a read abundance above 0.01% in at least one sample were considered in downstream analysis to reduce the number of false positives due to PCR and sequencing errors (17–19).

### *III. Sequence annotation*

MOTUs were classified using three approaches to maximize taxonomic assignments. We first ran a local BLASTn against 98 DNA barcodes obtained from vouchers sampled from the ARMS plates and against a curated reference database containing 16,679 COI sequences specific to coral reef fauna from the Mo'orea Biocode Inventory (<http://biocode.berkeley.edu/>). Second, we classified sequences using the ecotag algorithm (20), which takes a lowest common ancestor classification approach on representative sequences for each molecular operational taxonomic unit (MOTU) taxa in relation to a reference COI database (db COI Nov2018) that contained 192,929 filtered COI sequences (21). Lastly, we assigned sequences using the R package, Informatic Sequence Classification Trees (INSECT), that takes a probabilistic approach (hidden Markov model) to assignment against a classification tree built from 396,413 sequences extracted from the MIDORI database and GenBank (22).

Due to the limited number of marine invertebrate barcodes within reference databases, BLASTn identifications were accepted at  $\geq 85\%$  identity,  $\geq 85\%$  coverage, and  $\geq 200$  alignment length (9). Ecotag classifications were accepted if the “best identity” was  $\geq 85\%$  and INSECT assignments were set at a probability of  $\geq 0.80\%$ . We examined assignments across competing methods using a customized R script that assigned a “Final Phylum” and “Final Kingdom” based on the following step-wise hierarchical decision tree: 1) Sequences identified by the DNA barcodes obtained from this experiment or from the curated Mo'orea Biocode Database were accepted; 2) Assignments were accepted when the two remaining methods had matching phyla level identifications; 3) Assignments were accepted by the method when no other method had an assignment to the representative MOTU; and 4) we accepted the INSECT classification if the Akaike weight score was  $> 0.9$  and ecotag identification was  $< 0.90$ . For the few remaining outliers, assignment was based on the method with the greatest identity.

Using the Final Phylum and Final Kingdom assignments, we separated annotations into the following groups: metazoa, macroalgae, bacteria, unicellular algae, fungi, other eukaryote, other opisthokonta, and unclassified. To separate out the macroalgae and unicellular algae within the phylum Ochrophyta, MOTUs identified by ecotag and INSECT to the class Phaeophyceae were assigned to macroalgae. The macroalgae group consists of only red (Rhodophyta) and brown (Ochrophyta) algae due to the COI barcoding region being able to differentiate among species within these two algal groups (23–25). All MOTUs assigned to green algae (Chlorophyta) were removed because the COI region is not suitable for green algae (26). Within the phylum Chordata, only MOTUs assigned to the class Ascidiacea, subphylum Tunicata, were retained. Likewise, MOTUs assigned to the classes Insecta and Arachnida in the phylum Arthropoda were removed. For downstream analyses, we selected only those MOTUs assigned to the group metazoa and macroalgae which represented 77.6% of the sequences. For further classifications, we conservatively accepted Class, Order, Family, Genus, and Species annotations if percent identity was  $\geq 90\%$ ,  $\geq 92\%$ ,  $\geq 95\%$ ,  $>97\%$ , and  $\geq 98\%$ , respectively, and removed MOTUs (17.7%) that had no

taxonomic match to the phylum level. The exception being sponge species for which we excepted species identification if percent identity was 100% (15). All remaining MOTUs were translated into amino acids and aligned to the BIOCOTE reference data set using Multiple Alignment of Coding Sequences (MACSE) (27). MACSE detects interruptions in open reading frames from nucleotide substitutions that can result in stop codons which are likely to be pseudogenes. Any MOTUs that did not pass through MACSE were removed. Refer to Timmers et al (15) for more details on the accuracy of metabarcoding performance in the taxonomic validation of the phyla Porifera found on these ARMS plates.

### **Statistical Analysis**

Data were analyzed using R version 3.5.2 (R Core Team 2018). To control for the effects of library size estimates (numbers of sequences) (28, 29) and to ensure that the number of reads per MOTU were comparable across treatments, resulting community data were randomly rarefied using 100 repeated independent rarefactions using the 'rarefy.perm' function in *EcolUtils* (30). To examine unique and shared MOTUs among treatments, the overLapper function in the R package *systemPipeR* (31) was used on a random draw of 5 ARMS units per treatment to account for uneven sample sizes. The results were graphed using the 'olBarplot' function.

Observed MOTU richness was calculated using the 'specnumber' function in *vegan* (32) and analyzed using a 2-way ANOVA with temperature and pH as fixed factors nested within header tank. A post-hoc Tukey pairwise comparison was analyzed using the 'lsmeans' function in *lsmeans* (33). Assumptions of normality, equality of variance, and independence were assessed on the residuals via diagnostic plots and using shapiro.test, barlett.test, leveneTest, and the durbinWatsonTest functions from the package *car* (34).

Variation in community composition, defined as MOTU presence/absence, from temperature, acidification, and their interaction was analyzed using a Jaccard dissimilarity index within a permutational analysis of variance (PERMANOVA – 'adonis' function in *vegan*). The variation in community structure, defined as MOTU sequence relative abundance (35, 36), from temperature, acidification, and their interaction was analyzed on a Bray-Curtis distance matrix using a Hellinger standardization (square-root of relative abundance) in a PERMANOVA framework. A pairwise PERMANOVA using the 'adonis.pair' function with a false discovery adjustment in *EcolUtils* was conducted to examine differences between community composition and structure among treatments. A permutational analysis of multivariate dispersion (PERMDISP- 'betadisper' function in *vegan*) was performed on community composition and structure among replicates to examine community dispersion within treatments. A pairwise PERMDISP ('permutest.betadisper' function in *vegan*) was conducted to examine differences in variabilities among treatments and community data were visualized using a principal coordinate analysis (PCoA).

We examined the relationship of reads and MOTUs pooled to phyla among treatments relative to the Control treatment by taking a random draw of 5 ARMS units per treatment, to account for uneven sample sizes. We conducted a permutational 2-way ANOVA based on 999 permutations using the `perm.anova` function in *RVAideMemoire* to examine variations in the read abundance of the top 7 phyla with temperature and pH as fixed factors. We pooled taxa to the family level and classified families into the following calcification levels: heavily calcified, limited calcification, and no calcification. Taxa that have calcium carbonate skeletal forms, such as marine snails and brittle stars, were classified as heavily calcified, while limited calcification included taxa which incorporate the biomineralization of carbonate into part of their body form, such as crustaceans (37). Calcareous sponges were not included in this analysis due to the inability of the COI primers to amplify sponges from the class Calcarea (15). Those families that represented a minimum of 4% of the reads were examined using a permutational 2-way ANOVA and the relationship of reads among treatments relative to the Control treatment were examined and visualized.

## SI References:

1. K. E. F. Shamberger, *et al.*, Calcification and organic production on a Hawaiian coral reef. *Mar Chem* **127**, 64–75 (2011).
2. Ò. Guadayol, N. J. Silbiger, M. J. Donahue, F. I. M. Thomas, Patterns in Temporal Variability of Temperature, Oxygen and pH along an Environmental Gradient in a Coral Reef. *PLoS ONE* **9**, e85213 (2014).
3. C. P. Jury, M. N. Delano, R. J. Toonen, High heritability of coral calcification rates and evolutionary potential under ocean acidification. *Sci Rep* **9**, 20419 (2019).
4. A. G. Dickson, C. L. Sabine, J. R. Christian, C. P. Barger, North Pacific Marine Science Organization, Eds., *Guide to best practices for ocean CO<sub>2</sub> measurements* (North Pacific Marine Science Organization, 2007).
5. E. Lewis, D. W. R. Wallace, Program Developed for CO<sub>2</sub> System Calculations, ORNL/CDIAC-105 (1998).
6. K. S. Rodgers, P. L. Jokiel, E. K. Brown, S. Hau, R. Sparks, Over a Decade of Change in Spatial and Temporal Dynamics of Hawaiian Coral Reef Communities. *Pac Sci* **69**, 1–13 (2015).
7. E. Franklin, P. Jokiel, M. Donahue, Predictive modeling of coral distribution and abundance in the Hawaiian Islands. *Mar. Ecol. Prog. Ser.* **481**, 121–132 (2013).
8. K. D. Gorospe, *et al.*, Local Biomass Baselines and the Recovery Potential for Hawaiian Coral Reef Fish Communities. *Front. Mar. Sci.* **5**, 162 (2018).

9. E. Ransome, *et al.*, The importance of standardization for biodiversity comparisons: A case study using autonomous reef monitoring structures (ARMS) and metabarcoding to measure cryptic diversity on Mo'orea coral reefs, French Polynesia. *PLoS ONE* **12**, e0175066 (2017).
10. M. Leray, *et al.*, A new versatile primer set targeting a short fragment of the mitochondrial COI region for metabarcoding metazoan diversity: application for characterizing coral reef fish gut contents. *Front Zool* **10**, 34 (2013).
11. J. Geller, C. Meyer, M. Parker, H. Hawk, Redesign of PCR primers for mitochondrial cytochrome *c* oxidase subunit I for marine invertebrates and application in all-taxa biotic surveys. *Mol Ecol Resour* **13**, 851–861 (2013).
12. R. C. Edgar, UPARSE: highly accurate OTU sequences from microbial amplicon reads. *Nat Methods* **10**, 996–998 (2013).
13. T. Rognes, T. Flouri, B. Nichols, C. Quince, F. Mahé, VSEARCH: a versatile open source tool for metagenomics. *PeerJ* **4**, e2584 (2016).
14. M. Martin, Cutadapt removes adapter sequences from high-throughput sequencing reads. *EMBnet Journal*, 10–12 (2011).
15. M. A. Timmers, J. Vicente, M. Webb, C. P. Jury, R. J. Toonen, Sponging up diversity: Evaluating metabarcoding performance for a taxonomically challenging phylum within a complex cryptobenthic community. *Environ DNA*, edn3.163 (2020).
16. R. C. Edgar, H. Flyvbjerg, Error filtering, pair assembly and error correction for next-generation sequencing reads. *Bioinformatics* **31**, 3476–3482 (2015).
17. N. A. Bokulich, *et al.*, Quality-filtering vastly improves diversity estimates from Illumina amplicon sequencing. *Nat Methods* **10**, 57–59 (2013).
18. V. Elbrecht, F. Leese, Validation and Development of COI Metabarcoding Primers for Freshwater Macroinvertebrate Bioassessment. *Front. Environ. Sci.* **5** (2017).
19. I. Bista, *et al.*, Annual time-series analysis of aqueous eDNA reveals ecologically relevant dynamics of lake ecosystem biodiversity. *Nat Commun* **8**, 14087 (2017).
20. F. Boyer, *et al.*, OBITOOLS: a UNIX-inspired software package for DNA metabarcoding. *Mol Ecol Resour* **16**, 176–182 (2016).
21. O. S. Wangensteen, C. Palacín, M. Guardiola, X. Turon, DNA metabarcoding of littoral hard-bottom communities: high diversity and database gaps revealed by two molecular markers. *PeerJ* **6**, e4705 (2018).
22. S. P. Wilkinson, S. K. Davy, M. Bunce, M. Stat, “Taxonomic identification of environmental DNA with informatic sequence classification trees.” (PeerJ Preprints, 2018) <https://doi.org/10.7287/peerj.preprints.26812v1> (November 24, 2020).



23. D. C. McDevit, G. W. Saunders, On the utility of DNA barcoding for species differentiation among brown macroalgae (Phaeophyceae) including a novel extraction protocol. *Phycol Res* **57**, 131–141 (2009).
24. L. Le Gall, G. W. Saunders, DNA barcoding is a powerful tool to uncover algal diversity: a case study of the Phyllophoraceae (Gigartinales, Rhodophyta) in the Canadian flora. *J Phycol* **46**, 374–389 (2010).
25. A. R. Sherwood, A. Kurihara, K. Y. Conklin, T. Sauvage, G. G. Presting, The Hawaiian Rhodophyta Biodiversity Survey (2006-2010): a summary of principal findings. *BMC Plant Biol* **29** (2010).
26. G. W. Saunders, H. Kucera, An evaluation of rbcL, tufA, UPA, LSU and ITS as DNA barcode markers for the marine green macroalgae. *Cryptogamie Algologie* **31**, 487–528 (2010).
27. V. Ranwez, S. Harispe, F. Delsuc, E. J. P. Douzery, MACSE: Multiple Alignment of Coding SEquences Accounting for Frameshifts and Stop Codons. *PLoS ONE* **6**, e22594 (2011).
28. N. J. Gotelli, R. K. Colwell, Quantifying biodiversity: procedures and pitfalls in the measurement and comparison of species richness. *Ecol Lett* **4**, 379–391 (2001).
29. S. Weiss, *et al.*, Normalization and microbial differential abundance strategies depend upon data characteristics. *Microbiome* **5**, 27 (2017).
30. G. Salazar, *EcolUtils: Utilities for community ecology analysis* (2020).
31. T. W. H. Backman, T. Girke, systemPipeR: NGS workflow and report generation environment. *BMC Bioinformatics* **17**, 388 (2016).
32. J. Oksanen, G. Blanchel, M. Friendly, R. Kindt, P. Legendre, *vegan: Community Ecology Package* (2019).
33. R. V. Lenth, Least-Squares Means: The R Package lsmeans. *J. Stat. Soft.* **69** (2016).
34. J. Fox, S. Weisberg, J. Fox, *An R companion to applied regression*, 2nd ed (SAGE Publications, 2011).
35. P. D. Lamb, *et al.*, How quantitative is metabarcoding: A meta-analytical approach. *Mol Ecol* **28**, 420–430 (2019).
36. J. Schenk, S. Geisen, N. Kleinboelting, W. Traunspurger, Metabarcoding data allow for reliable biomass estimates in the most abundant animals on earth. *MBMG* **3**, e46704 (2019).
37. M. S. Clark, Molecular mechanisms of biomineralization in marine invertebrates. *J Exp Biol* **223**, jeb206961 (2020).

SI Figures:

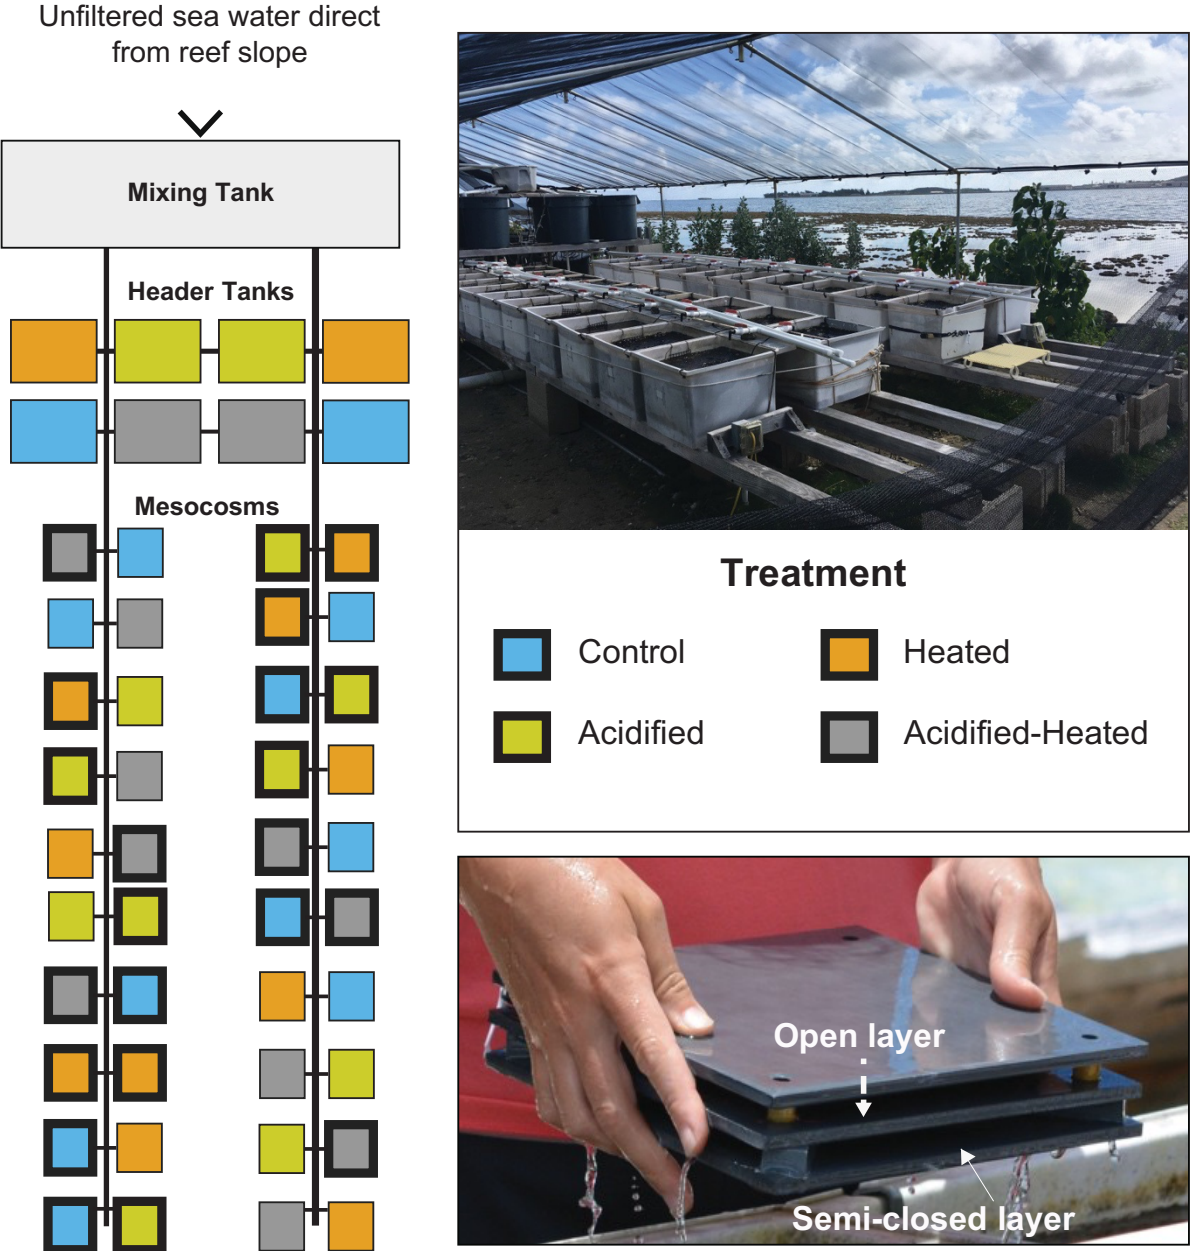

**Figure S1:** Schematic and image of the mesocosm system setup at the Hawaii Institute of Marine Biology. Mesocosms with ARMS units have a bolded outline. The structure of the modified ARMS unit is represented in the lower right-hand corner.

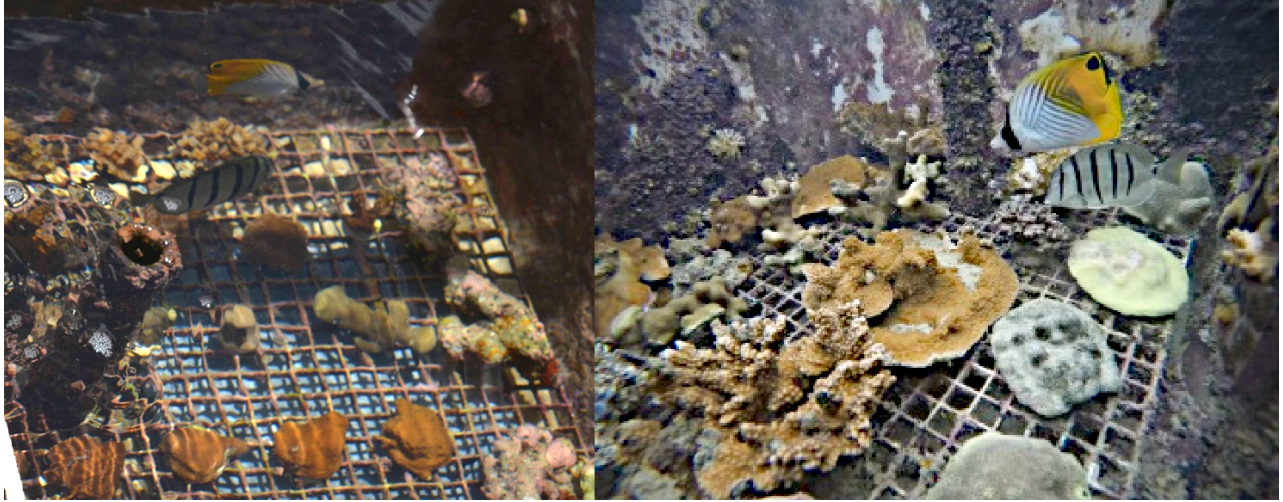

**Figure S2:** Representative photo of a mesocosm on the first day of the ARMS deployments (left) and after two years (right). The 2-tiered ARMS unit (see Figure S1) was placed below the grate to simulate the cryptobenthos.

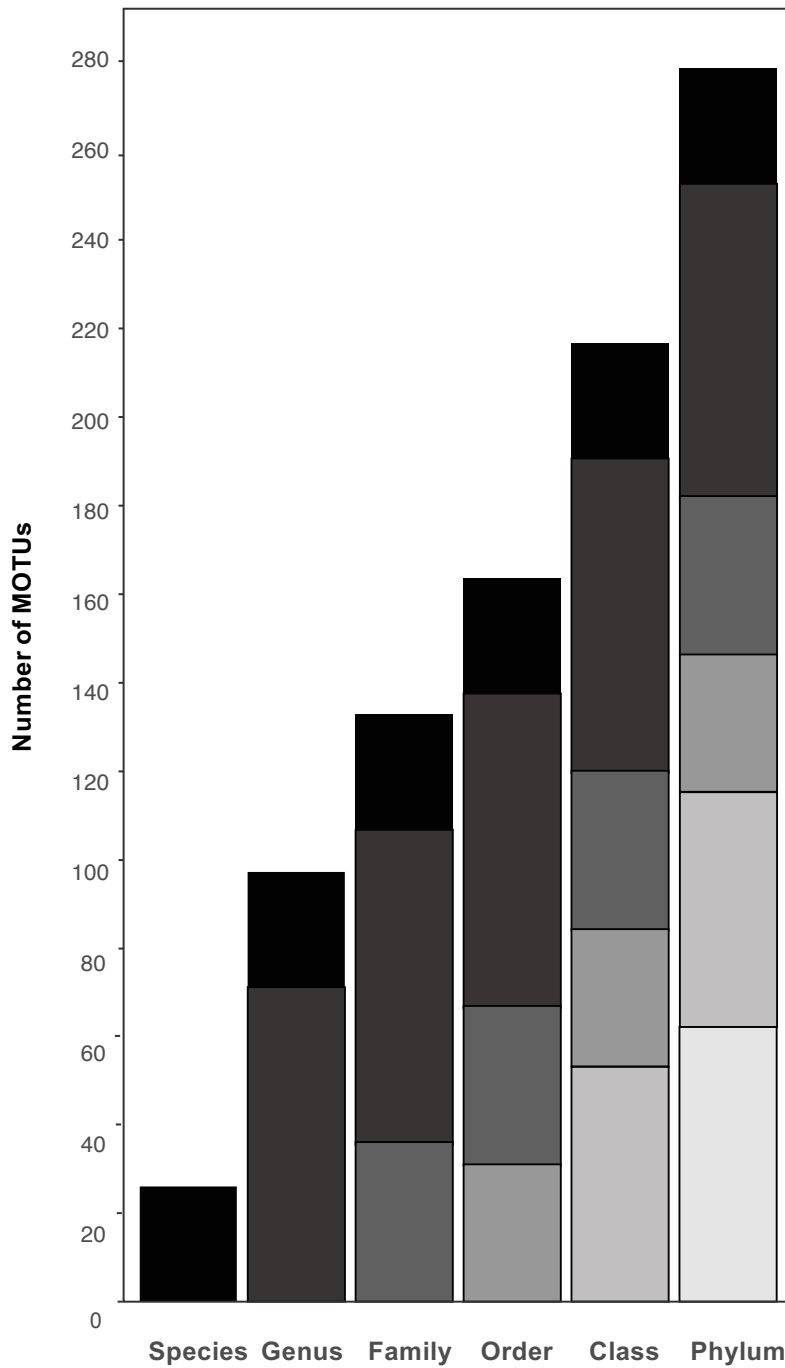

**Figure S3.** MOTU annotations across classification levels. Each taxon level has a representative shade of gray and is added to the next level of classification to represent the number of MOTUs identified among the 6 main classification levels. There was a total of 275 metazoan and macroalgae MOTUs contributing to this study.

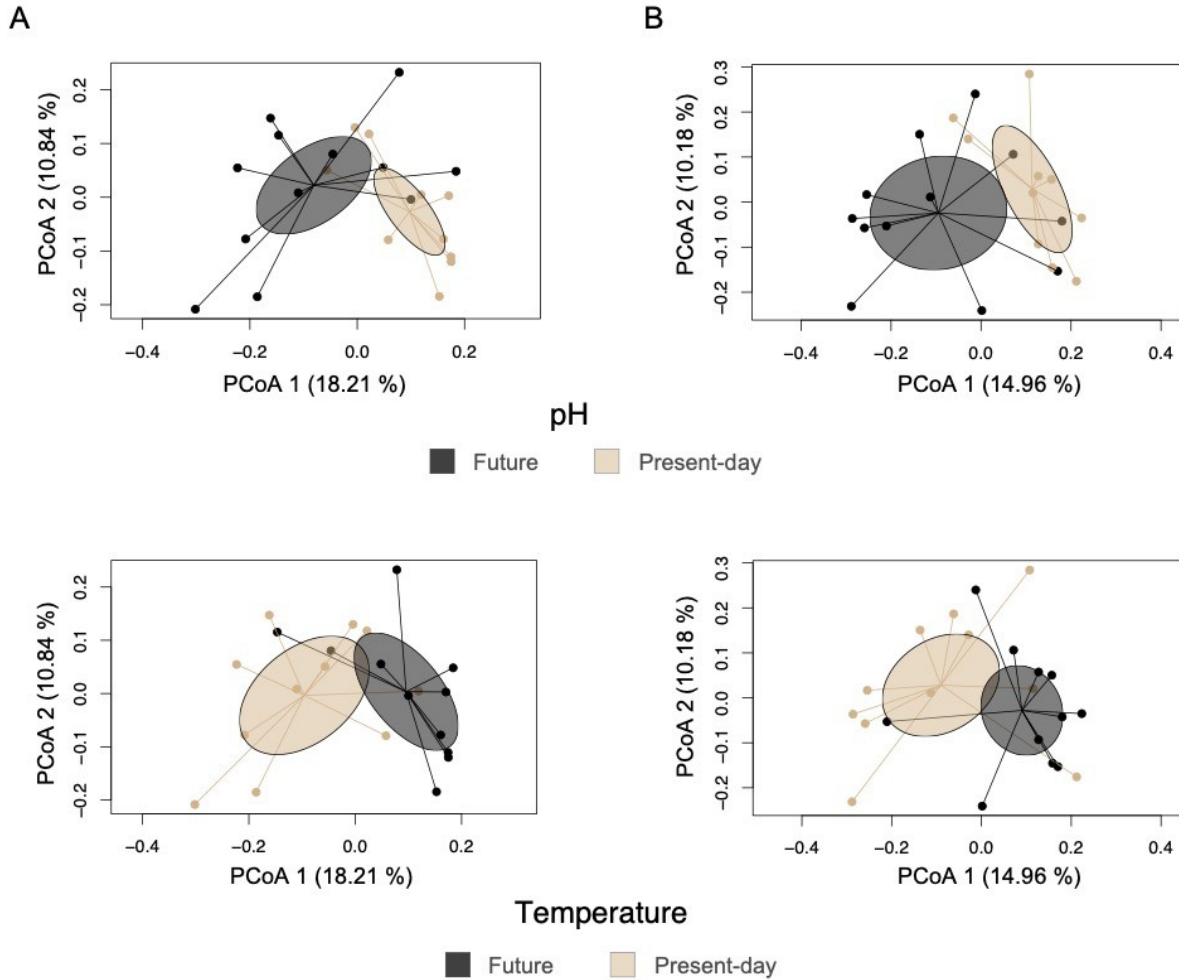

**Figure S4.** ARMS unit communities visualized through non-metric multi-dimensional scaling (NMDS) estimated by pH (upper panels) and temperature (lower panels), based on (A) community composition (presence/absence—Jaccard dissimilarity index) and (B) community structure (relative abundance—Bray-Curtis dissimilarity index). Ellipses are colored by future and present-day conditions as shown in the legend and based on the 95% confidence limit of the standard error around the means (SEM) for each group.

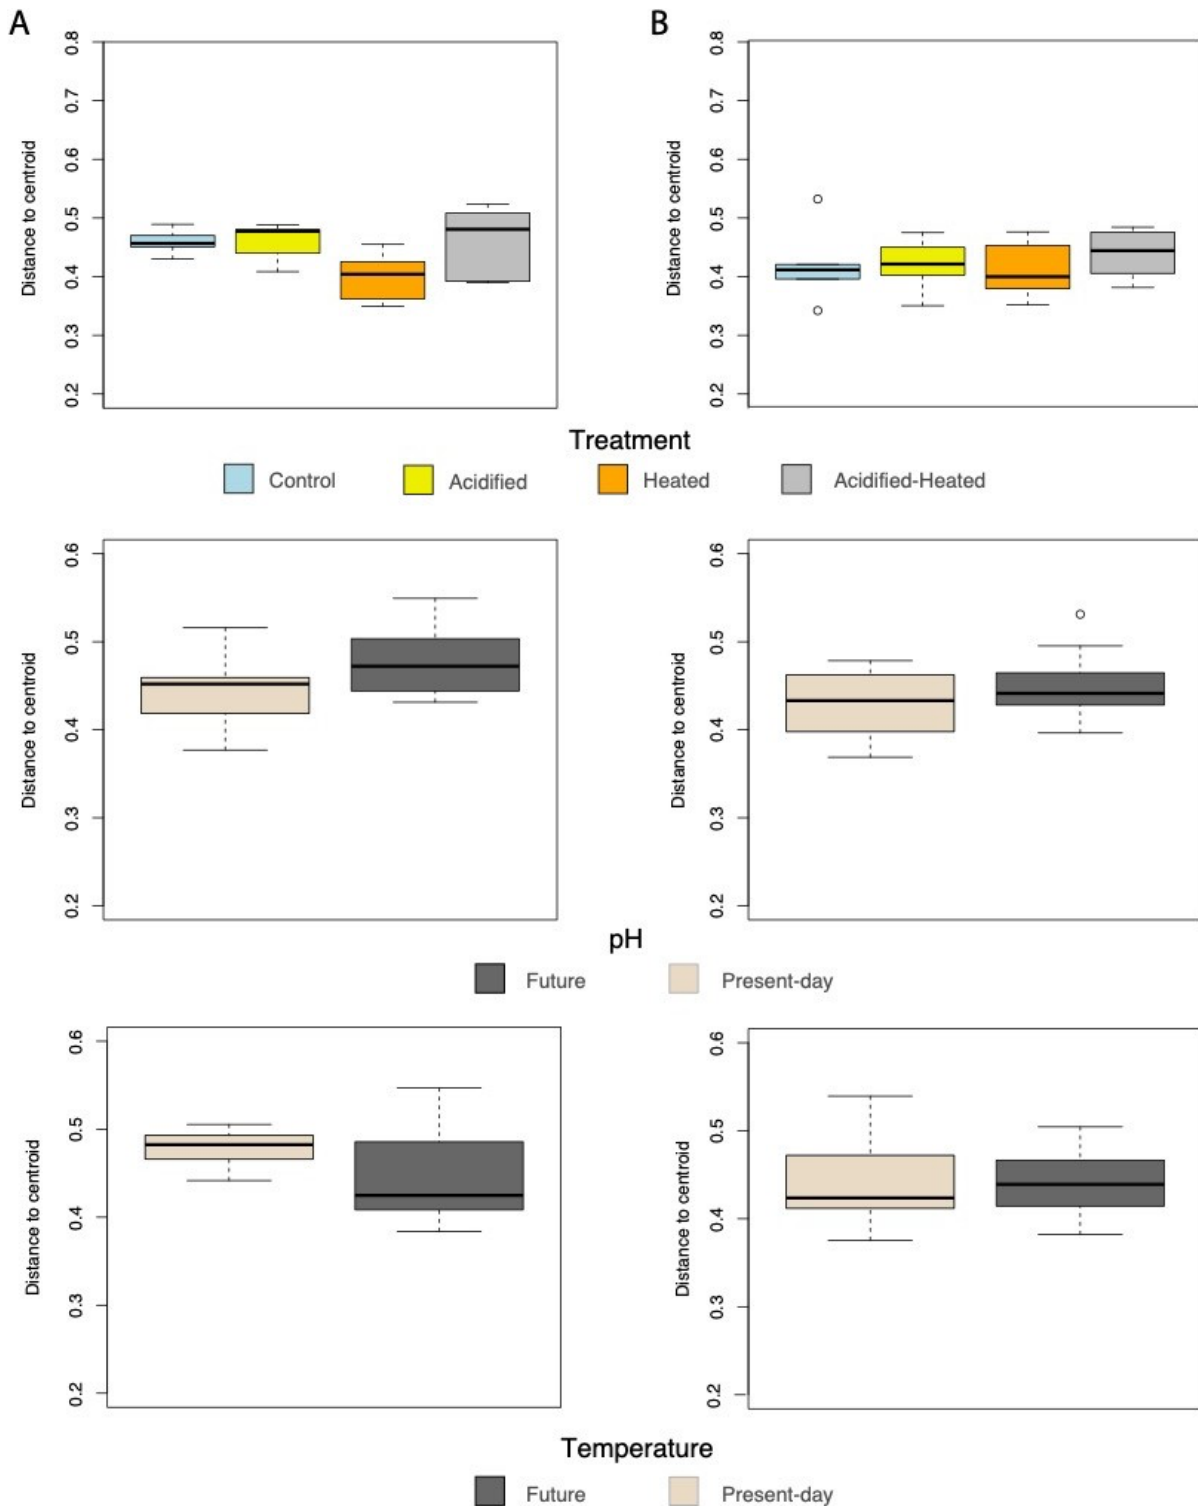

**Figure S5:** Boxplots of PERMDISP results examining the variation in group dispersion. estimated as (A) treatment, pH, and temperature based on the Jaccard dissimilarity index and (B) treatment, pH, and temperature based on the Bray-Curtis dissimilarity index. Box-plots show the median as center line, box limits are upper and lower quartiles, whiskers are 1.5x interquartile range, and open circles as outliers. See Table S6.

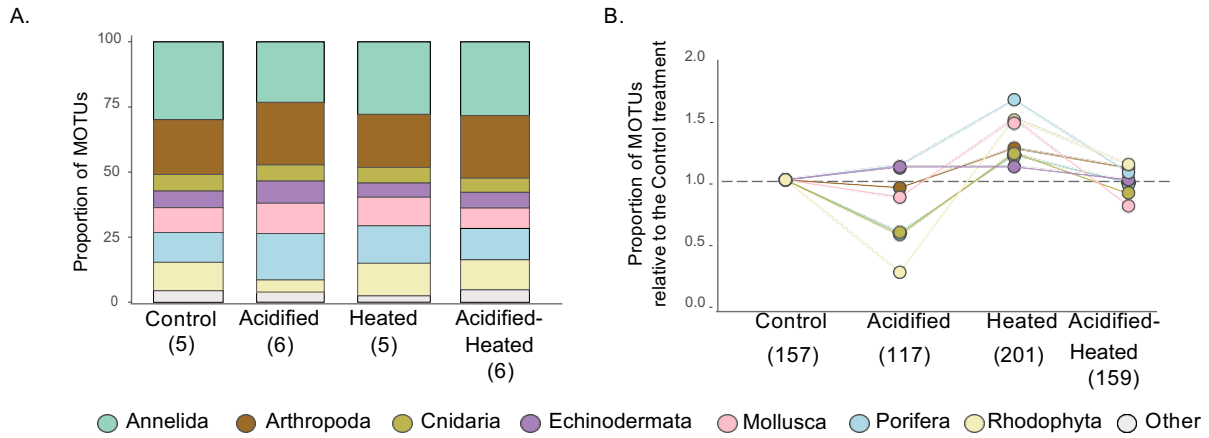

**Figure S6:** Variation in the top 7 phyla among treatments based on MOTUs. (A) Proportion of MOTUs by phyla within treatments. Number of sampling unit replicates in parentheses. (B) Proportion of MOTUs by phyla among treatments relative to the present-day (Control) condition. To account for sampling effects on richness, 5 randomly selected ARMS units per treatment were selected. Overall treatment richness is indicated within parentheses.

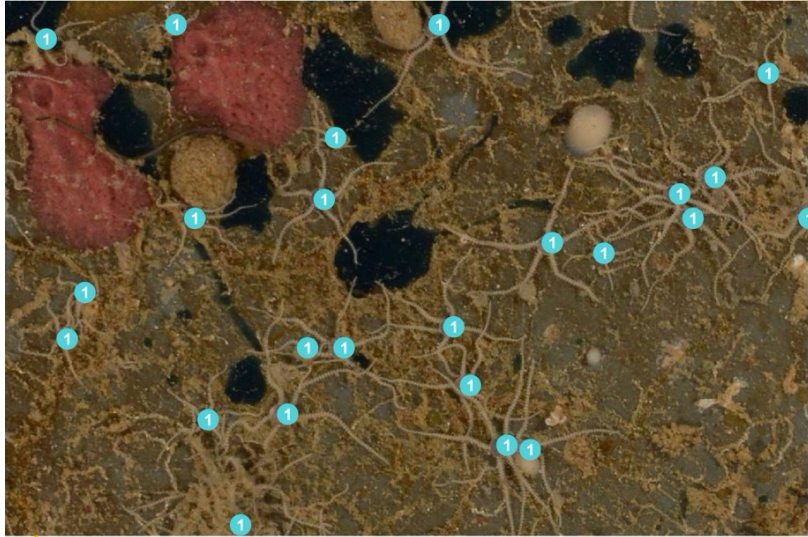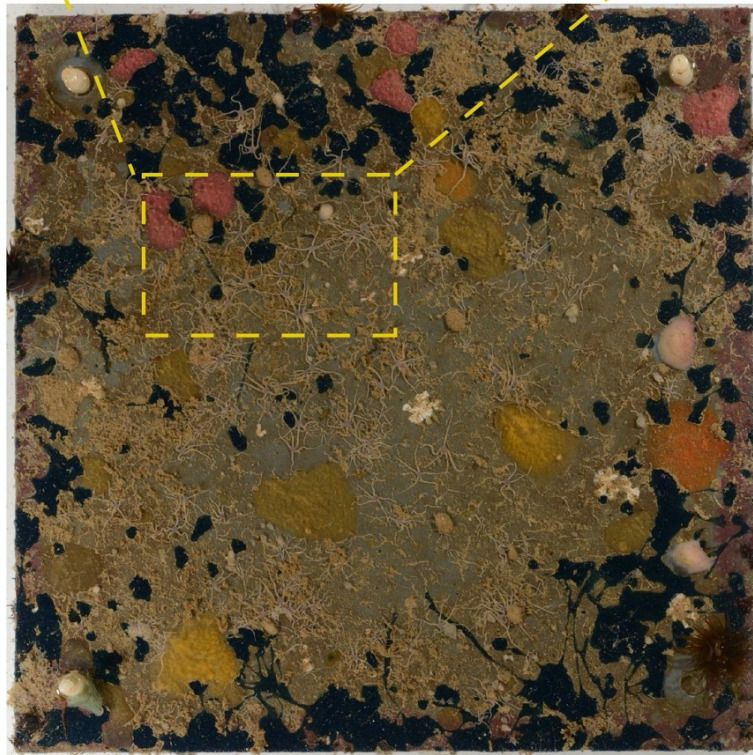

**Figure S7:** A plate from an ARMS that soaked in acidified conditions. Brittle stars are abundant across the entire plate. The light blue circles within the inset of a small section of the plate are placed on top of the brittle star's central disc to demonstrate their density.



Acidified

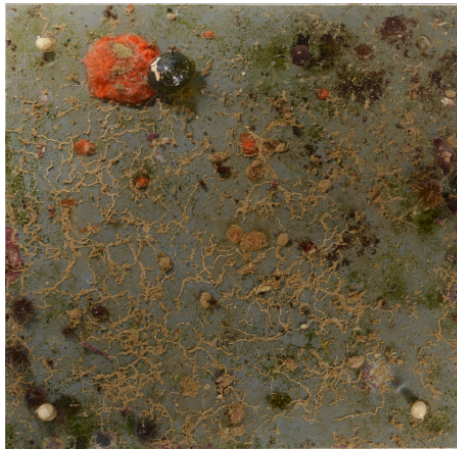

Acidified-Heated

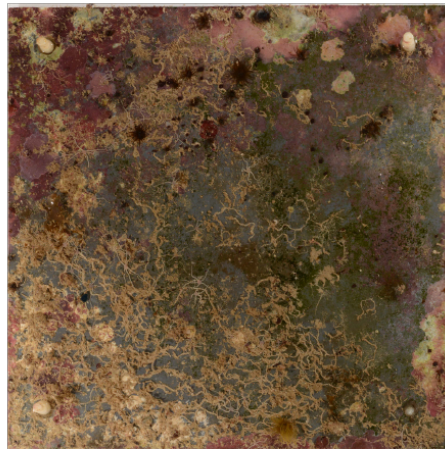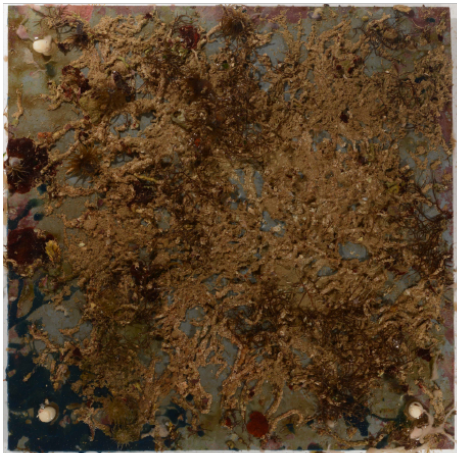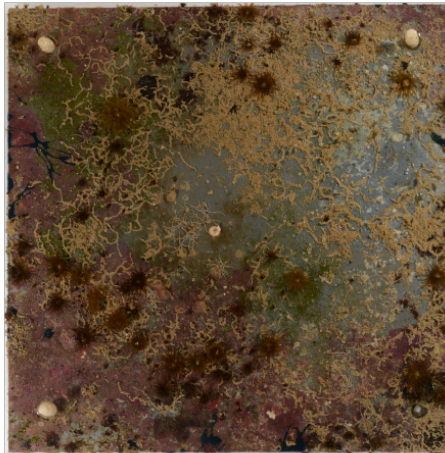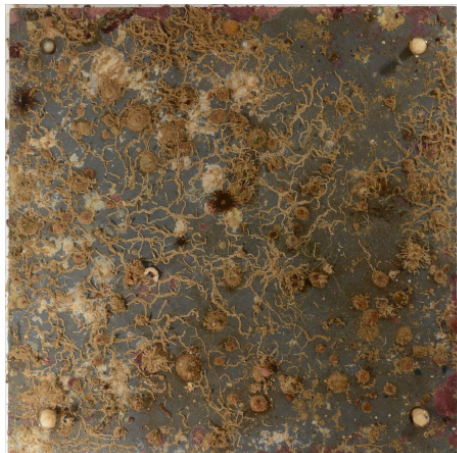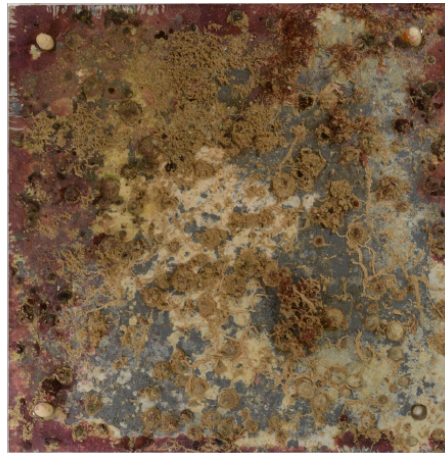

**Figure S8:** Representative top plates of ARMS units within the Acidified and Acidified-Heated treatments to represent the differences in red algae (Rhodophyta) among these treatments. The pink, mostly around the edges of the ARMS plates, is representative of red algae. The greater presence of red algae in the Acidified-Heated treatments compared to near absence of red algae in the Acidified treatments suggests a compensatory effect of warming.

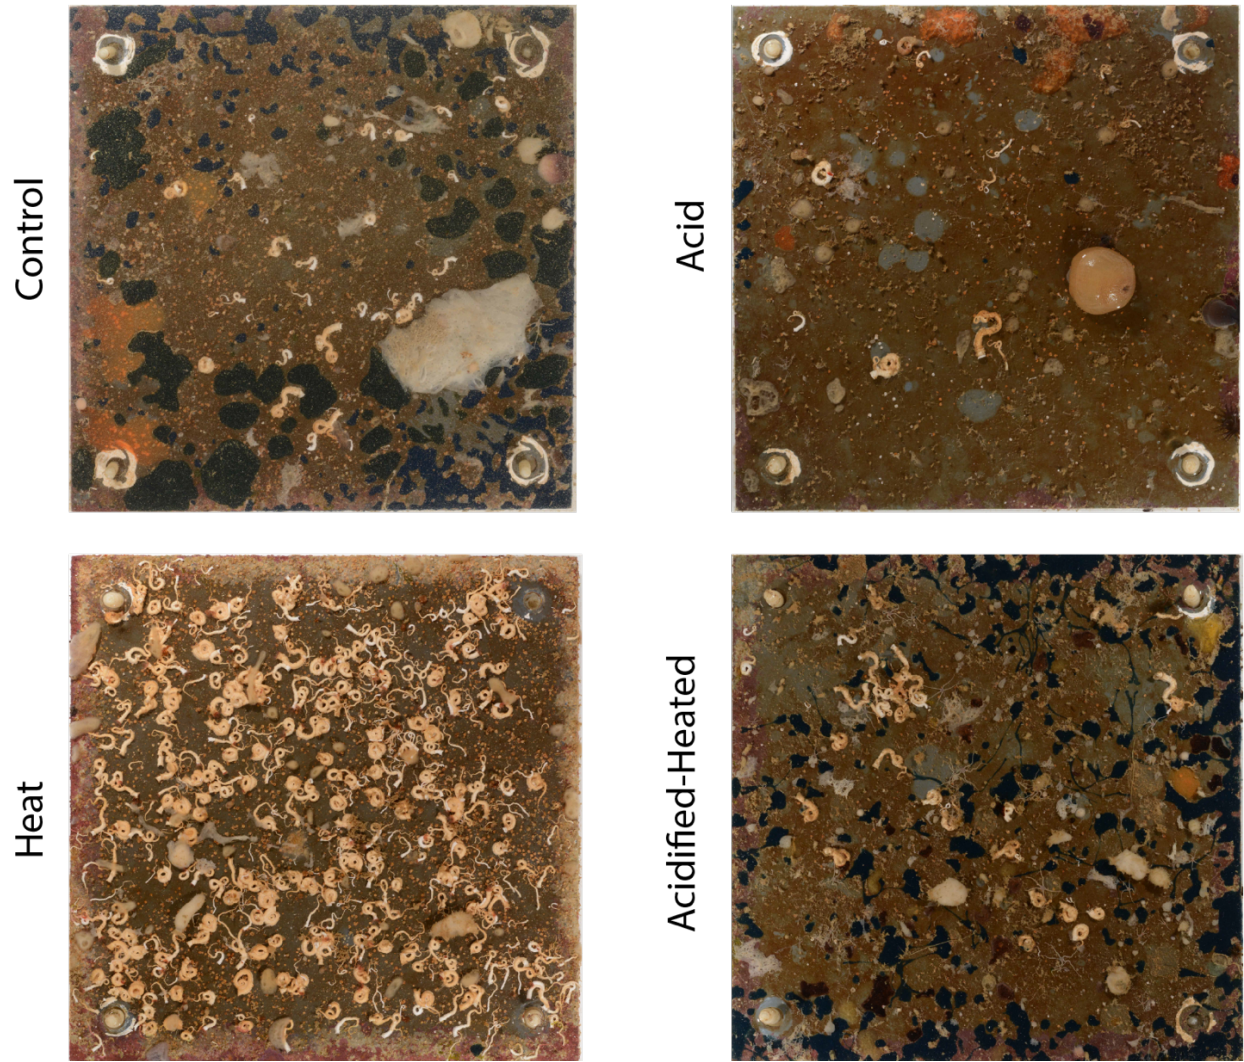

**Figure S9:** The bottom of a representative top plate of an ARMS unit from each treatment to demonstrate the variation of vermetid marine snails. Temperature had a positive effect on the read abundance of these marine snails.

Control

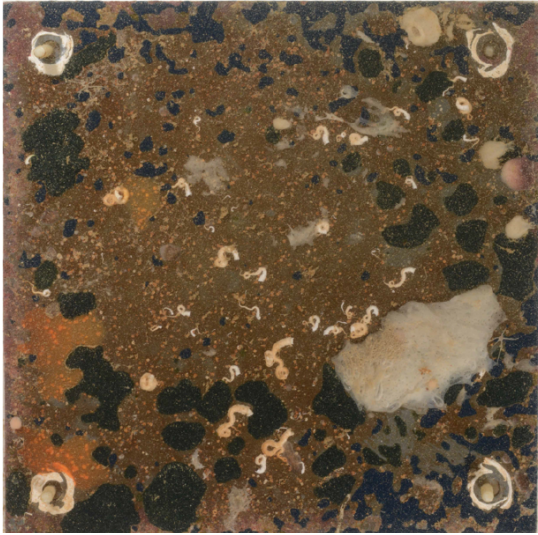

Heated

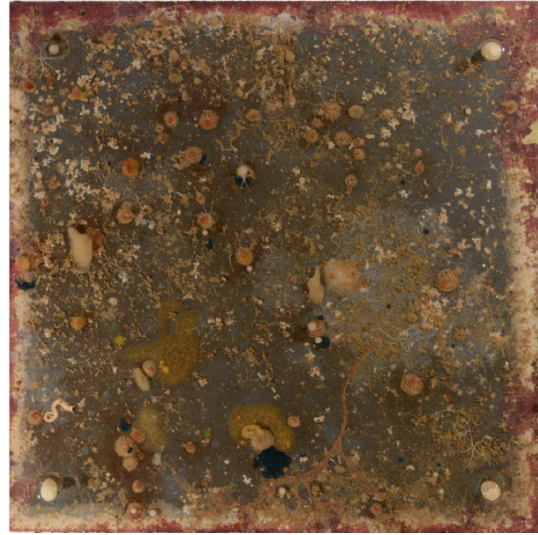

**Figure S10:** An ARMS plate example of sponges from the order Suberita (dark blue) from the Control and Heated treatments. Members of the Suberitidae family did not favor elevated temperature.

## SI Tables:

**Table S1.** Sequence details associated with each ARMS unit.

| Treatment        | ARMS Unit | Mesocosm Name | Raw numbers of sequences | Post Filtration | Metazoa & Macroalgae | Classified to Phylum | Post Rarefied |
|------------------|-----------|---------------|--------------------------|-----------------|----------------------|----------------------|---------------|
| Control          |           |               |                          |                 |                      |                      |               |
|                  | 1         | Control10     | 99151                    | 98102           | 70588                | 64252                | 16135         |
|                  | 2         | Control17     | 79252                    | 78290           | 54390                | 43857                | 16137         |
|                  | 3         | Control23     | 41939                    | 41552           | 34504                | 20539                | 16133         |
|                  | 4         | Control26     | 133359                   | 131426          | 87586                | 69356                | 16133         |
|                  | 5         | Control9      | 188537                   | 186078          | 121869               | 84384                | 16131         |
| Acidified        |           |               |                          |                 |                      |                      |               |
|                  | 6         | Acid1         | 147690                   | 146290          | 102861               | 90211                | 16133         |
|                  | 7         | Acid15        | 58971                    | 58450           | 47430                | 38223                | 16133         |
|                  | 8         | Acid25        | 23080                    | 22810           | 16867                | 16132                | 16132         |
|                  | 9         | Acid36        | 136750                   | 135074          | 96455                | 61968                | 16131         |
|                  | 10        | Acid39        | 87137                    | 86311           | 74351                | 51037                | 16135         |
|                  | 11        | Acid7         | 76079                    | 75351           | 59197                | 54573                | 16132         |
| Heated           |           |               |                          |                 |                      |                      |               |
|                  | 12        | Heat18        | 227257                   | 222986          | 139375               | 114585               | 16131         |
|                  | 13        | Heat22        | 108989                   | 107753          | 94682                | 87232                | 16132         |
|                  | 14        | Heat3         | 329916                   | 325855          | 237876               | 133258               | 16135         |
|                  | 15        | Heat31        | 489606                   | 483185          | 429862               | 348066               | 16132         |
|                  | 16        | Heat8         | 217388                   | 214452          | 197158               | 153143               | 16133         |
| Acidified-Heated |           |               |                          |                 |                      |                      |               |
|                  | 17        | AcidHeat16    | 86486                    | 85588           | 39209                | 34850                | 16130         |
|                  | 18        | AcidHeat20    | 69353                    | 68626           | 48010                | 43121                | 16137         |
|                  | 19        | AcidHeat21    | 35957                    | 35738           | 30917                | 26358                | 16127         |
|                  | 20        | AcidHeat24    | 107760                   | 106702          | 78706                | 58257                | 16132         |
|                  | 21        | AcidHeat33    | 71096                    | 70374           | 66717                | 35147                | 16135         |
|                  | 22        | AcidHeat4     | 176210                   | 174243          | 140163               | 128079               | 16132         |
| Total Sequences: |           |               | 2991963                  | 2955236         | 2268773              | 1756628              | 354921        |

**Table S2.** MOTU details associated with each ARMS unit.

| Treatment        | ARMS Unit | Mesocosm Name | Raw number of MOTUs | Post Filtration | Metazoa & Macroalgae | Classified to Phylum | Total Richness |
|------------------|-----------|---------------|---------------------|-----------------|----------------------|----------------------|----------------|
| Control          | 1         | Control10     | 532                 | 161             | 86                   | 53                   | 53             |
|                  | 2         | Control17     | 613                 | 208             | 119                  | 81                   | 81             |
|                  | 3         | Control23     | 417                 | 154             | 103                  | 65                   | 65             |
|                  | 4         | Control26     | 800                 | 217             | 120                  | 82                   | 82             |
|                  | 5         | Control9      | 790                 | 183             | 106                  | 63                   | 63             |
| Acidified        | 6         | Acid1         | 590                 | 138             | 74                   | 47                   | 47             |
|                  | 7         | Acid15        | 421                 | 130             | 72                   | 49                   | 49             |
|                  | 8         | Acid25        | 372                 | 161             | 89                   | 59                   | 59             |
|                  | 9         | Acid36        | 629                 | 144             | 85                   | 56                   | 56             |
|                  | 10        | Acid39        | 489                 | 134             | 80                   | 54                   | 54             |
|                  | 11        | Acid7         | 453                 | 129             | 67                   | 43                   | 43             |
| Heated           | 12        | Heat18        | 1133                | 260             | 159                  | 111                  | 111            |
|                  | 13        | Heat22        | 637                 | 185             | 123                  | 90                   | 90             |
|                  | 14        | Heat3         | 1084                | 226             | 157                  | 97                   | 97             |
|                  | 15        | Heat31        | 1164                | 216             | 146                  | 101                  | 101            |
|                  | 16        | Heat8         | 884                 | 223             | 134                  | 93                   | 93             |
| Acidified-Heated | 17        | AcidHeat16    | 501                 | 159             | 77                   | 50                   | 50             |
|                  | 18        | AcidHeat20    | 493                 | 199             | 109                  | 78                   | 78             |
|                  | 19        | AcidHeat21    | 307                 | 167             | 109                  | 81                   | 81             |
|                  | 20        | AcidHeat24    | 541                 | 179             | 115                  | 80                   | 80             |
|                  | 21        | AcidHeat33    | 480                 | 143             | 99                   | 63                   | 63             |
|                  | 22        | AcidHeat4     | 701                 | 162             | 94                   | 57                   | 57             |
| Total MOTUs:     |           |               | 2602                | 859             | 443                  | 275                  | 275            |

**Table S3.** Breakdown of sequence reads and MOTUs associated with taxonomic groups.

|                            |                    | MOTU | Sequences |
|----------------------------|--------------------|------|-----------|
| Total                      |                    | 2602 | 2,991,963 |
| Post 0.01% MOTU Filtration |                    | 853  | 2,955,236 |
| Higher Taxa Group          |                    |      |           |
|                            | Bacteria           | 3    | 4759      |
|                            | Metazoa            | 405  | 2,201,434 |
|                            | MicoAlgae          | 62   | 21,224    |
|                            | Other_Eukaryota    | 235  | 367,023   |
|                            | Other_Opisthokonta | 1    | 108       |
|                            | Macroalgae         | 38   | 67,339    |
|                            | Unclassified       | 97   | 270,527   |
| Metazoa & Macroalgae       |                    |      |           |
|                            | Unclassified       | 164  | 512,145   |
|                            | Classified         | 279  | 1,756,628 |
| Classified & Subsampled    | Total              | 275  | 354,921   |
| Phyla                      |                    |      |           |
|                            | Annelida           | 70   | 104,046   |
|                            | Arthropoda         | 66   | 34,037    |
|                            | Bryozoa            | 2    | 78        |
|                            | Tunicata           | 2    | 636       |
|                            | Cnidaria           | 19   | 16,246    |
|                            | Echinodermata      | 11   | 60,665    |
|                            | Gastrotricha       | 2    | 9         |
|                            | Mollusca           | 23   | 64,572    |
|                            | Nemertea           | 1    | 18        |
|                            | Ochrophyta         | 5    | 74        |
|                            | Platyhelminthes    | 1    | 209       |
|                            | Porifera           | 41   | 61,120    |
|                            | Rhodophyta         | 32   | 16,207    |

**Table S4.** Approximately 10% of all MOTUs identified to a species level based on  $\geq 98\%$  sequence similarity for all phyla minus MOTUs within the phylum Porifera which is based on 100% sequence similarity. These MOTUs do not necessarily represent the most abundant taxa from the mesocosm but rather could be identified due to available barcodes. Only 4% of MOTUs have a taxonomic species name likely because they are cosmopolitan species that have been previously studied and barcoded.

| Phylum        | Class            | Order             | Family           | Genus          | Species                   |
|---------------|------------------|-------------------|------------------|----------------|---------------------------|
| Annelida      | Polychaeta       | Eunicida          | Eunicidae        | Nematonereis   | unicornis                 |
| Annelida      | Polychaeta       | Terebellida       | Cirratulidae     | Timarete       | punctata                  |
| Arthropoda    | Malacostraca     | Amphipoda         | Gammaridae       |                | Gammaridae sp. KML 32     |
| Arthropoda    | Malacostraca     | Amphipoda         | Paracalliopiidae | Yhi            | yindi                     |
| Cnidaria      | Anthozoa         | Actiniaria        | Aiptasiidae      | Aiptasia       | pulchella                 |
| Cnidaria      | Anthozoa         | Actiniaria        | Sagartiidae      | Sagartiogeton  | laceratus                 |
| Cnidaria      | Hydrozoa         | Leptothecata      | Campanulariidae  | Clytia         | simplex                   |
| Echinodermata | Ophiuroidea      | Ophiurida         | Ophiactidae      | Ophiactis      | savignyi                  |
| Echinodermata | Ophiuroidea      | Ophiurida         | Amphiuridae      | Amphipholis    | squamata                  |
| Mollusca      | Gastropoda       | Littorinimorpha   | Hipponicidae     | Antisabia      | imbricata                 |
| Mollusca      | Gastropoda       | Littorinimorpha   | Vermetidae       | Dendropoma     | meroclista                |
| Mollusca      | Gastropoda       | Littorinimorpha   | Vermetidae       | Dendropoma     | rhyssosconchum            |
| Mollusca      | Gastropoda       | Littorinimorpha   | Vermetidae       | Petalosconchus | keenae                    |
| Mollusca      | Gastropoda       | Trochida          | Trochidae        | Trochus        | intextus                  |
| Porifera      | Demospongiae     | Haplosclerida     | Chalinidae       | Halicona       | Halicona sp.2 JV-2020     |
| Porifera      | Demospongiae     | Haplosclerida     | Niphatidae       |                | Niphatidae sp.8 PRT-2020  |
| Porifera      | Demospongiae     | Poecilosclerida   | Tedaniidae       | Tedania        | klausii                   |
| Porifera      | Demospongiae     | Suberitida        | Halichondriidae  | Hymeniacion    | Hymeniacion sp.1 JV-2020  |
| Porifera      | Demospongiae     | Suberitida        | Halichondriidae  | Halichondria   | Halichondria sp.1 JV-2020 |
| Porifera      | Demospongiae     | Suberitida        | Suberitidae      |                | Suberitidae sp.1 JV-2020  |
| Porifera      | Demospongiae     | Suberitida        | Suberitidae      | Terpios        | Terpios sp.1 JV-2020      |
| Porifera      | Demospongiae     | Tethyida          | Tethyidae        | Tethya         | Tethya sp.2 JV-2020       |
| Porifera      | Demospongiae     | Tethyida          | Tethyidae        | Tethya         | Tethya sp.3 JV-2020       |
| Porifera      | Homoscleromorpha | Homosclerophorida | Plakinidae       | Plakina        | Plakina sp.1 JV-2020      |
| Porifera      | Homoscleromorpha | Homosclerophorida | Plakinidae       | Plakortis      | Plakortis sp.1 JV-2020    |
| Porifera      | Homoscleromorpha | Homosclerophorida | Oscarellidae     | Oscarella      | Oscarella sp.3 JV-2020    |

**Table S5.** Richness summary statistics by treatment.

| Treatment        | ARMS units | Mean | sd   |
|------------------|------------|------|------|
| Control          | 5          | 68.8 | 12.5 |
| Acidified        | 6          | 51.3 | 6.02 |
| Heated           | 5          | 98.4 | 8.17 |
| Acidified-Heated | 6          | 68.2 | 13.3 |

**Table S6.** A two-way ANOVA on the effects of elevated temperature (T), acidification (A) and their interaction (T×A) nested within the header tank (Header) on observed richness.

| Factors        | Df | SS    | MS    | F     | P                 |
|----------------|----|-------|-------|-------|-------------------|
| T              | 1  | 2818  | 2818  | 27.27 | <b>&lt; 0.001</b> |
| A              | 1  | 3102  | 3102  | 30.02 | <b>&lt; 0.001</b> |
| T x A          | 1  | 222   | 222   | 2.15  | 0.165             |
| Header (T x A) | 4  | 505.2 | 126.3 | 1.22  | 0.345             |
| Residuals      | 14 | 1447  | 103.4 |       |                   |

Df = degrees of freedom, SS = sum of squares, MS = mean squares, F = the F-value, and P = the probability. Bolded p-values indicates significance at  $p < 0.05$ .

**Table S7.** Pairwise post-hoc lsmeans method comparing a family of 4 estimates (presence/absence of elevated temperature and acidification conditions) translated into treatment names averaged over header tank with observed richness.

| Treatments                   | estimate | SE   | df | t.ratio | p-adj            |
|------------------------------|----------|------|----|---------|------------------|
| Acidified & Heated           | -46.58   | 6.23 | 14 | -7.482  | <b>&lt;0.001</b> |
| Acidified & Acidified-Heated | -16.83   | 5.87 | 14 | -2.868  | 0.054            |
| Acidified-Heated & Heated    | 29.75    | 6.23 | 14 | 4.779   | <b>0.002</b>     |
| Control & Acidified          | 18.25    | 6.23 | 14 | 2.931   | <b>0.047</b>     |
| Control & Heated             | -28.33   | 6.56 | 14 | -4.318  | <b>0.004</b>     |
| Control & Acidified-Heated   | 1.45     | 6.23 | 14 | 0.228   | 0.996            |

Diff = the difference in the observed means, lwr = the lower end point, upr = upper end point, bold p-adj indicates significance at  $p < 0.05$  and gray p-adj indicates values at  $p < 0.1$ .



**Table S8.** Pairwise Permutational Multivariate Analysis of Variance (PERMANOVA) of the community response between treatments.

| Treatment                    | Metric      | R2   | p-adj           |
|------------------------------|-------------|------|-----------------|
| Acidified & Acidified-Heated | Bray-Curtis | 0.17 | <b>0.01</b>     |
|                              | Jaccard     | 0.15 | <b>&lt;0.01</b> |
| Acidified & Heated           | Bray-Curtis | 0.24 | <b>0.01</b>     |
|                              | Jaccard     | 0.25 | <b>&lt;0.01</b> |
| Acidified-Heated & Heated    | Bray-Curtis | 0.15 | <b>0.01</b>     |
|                              | Jaccard     | 0.16 | <b>&lt;0.01</b> |
| Control & Acidified          | Bray-Curtis | 0.19 | <b>0.01</b>     |
|                              | Jaccard     | 0.16 | <b>&lt;0.01</b> |
| Control & Heated             | Bray-Curtis | 0.16 | <b>0.05</b>     |
|                              | Jaccard     | 0.17 | <b>&lt;0.01</b> |
| Control & Acidified-Heated   | Bray-Curtis | 0.14 | <b>0.05</b>     |
|                              | Jaccard     | 0.09 | 0.62            |

The permutational probability based on 9999 permutations with a false discovery rate adjusted to the p-value. Bold p-adj indicate a significance at  $p < 0.05$ .

**Table S9.** Permutational Analysis of Multivariate Dispersion (PERMDISP) on treatments and elevated temperature and increased pH conditions.

| Metric      | Factors     | Df | SS     | Pseudo-F | P    |
|-------------|-------------|----|--------|----------|------|
| Bray-Curtis | Treatment   | 3  | 0.002  | 0.28     | 0.84 |
|             | Temperature | 1  | <0.001 | 0.07     | 0.80 |
|             | pH          | 1  | 0.002  | 1.69     | 0.22 |
| Jaccard     | Treatment   | 3  | 0.015  | 2.83     | 0.09 |
|             | Temperature | 1  | 0.003  | 1.74     | 0.20 |
|             | pH          | 1  | 0.007  | 3.94     | 0.06 |

Degrees of freedom (DF), sum of squares (SS), the pseudo F-value (Pseudo-F), and the permutational probability (P) based on 9999 permutations. Significance is based on  $p < 0.05$ . Gray values represent  $p < 0.1$

**Table S10.** Pairwise Permutational Analysis of Multivariate Dispersion (PERMDISP) on treatments.

| Treatment                    | Metric      | p-adj       |
|------------------------------|-------------|-------------|
| Acidified & Acidified-Heated | Bray-Curtis | 0.59        |
|                              | Jaccard     | 0.99        |
| Acidified & Heated           | Bray-Curtis | 0.78        |
|                              | Jaccard     | <b>0.02</b> |
| Acidified-Heated & Heated    | Bray-Curtis | 0.36        |
|                              | Jaccard     | 0.08        |
| Control & Acidified          | Bray-Curtis | 0.99        |
|                              | Jaccard     | 0.86        |
| Control & Heated             | Bray-Curtis | 0.83        |
|                              | Jaccard     | <b>0.02</b> |
| Control & Acidified-Heated   | Bray-Curtis | 0.59        |
|                              | Jaccard     | 0.90        |

The permutational probability based on 9999 permutations with a false discovery rate adjusted to the p-value. Bold p-adj indicate significance at  $p < 0.05$ .

**Table S11.** Proportion of phyla reads within each treatment relative to the Control condition.

| Phylum        | Total Reads per Phylum | Treatment        | Reads per Treatment | Relative Abundance of Reads | Proportion of Reads Relative to Control |
|---------------|------------------------|------------------|---------------------|-----------------------------|-----------------------------------------|
| Annelida      | 91261                  | Control          | 26166               | 28.67                       | 1.00                                    |
|               |                        | Acidified        | 26758               | 29.32                       | 1.02                                    |
|               |                        | Heated           | 18412               | 20.18                       | 0.70                                    |
|               |                        | Acidified-Heated | 19925               | 21.83                       | 0.76                                    |
| Arthropoda    | 31372                  | Control          | 3549                | 11.31                       | 1.00                                    |
|               |                        | Acidified        | 11427               | 36.42                       | 3.22                                    |
|               |                        | Heated           | 6738                | 21.48                       | 1.90                                    |
|               |                        | Acidified-Heated | 9658                | 30.79                       | 2.72                                    |
| Cnidaria      | 13902                  | Control          | 4011                | 28.85                       | 1.00                                    |
|               |                        | Acidified        | 3391                | 24.39                       | 0.85                                    |
|               |                        | Heated           | 3597                | 25.87                       | 0.90                                    |
|               |                        | Acidified-Heated | 2903                | 20.88                       | 0.72                                    |
| Echinodermata | 54431                  | Control          | 9822                | 18.04                       | 1.00                                    |
|               |                        | Acidified        | 20736               | 38.10                       | 2.11                                    |
|               |                        | Heated           | 5894                | 10.83                       | 0.60                                    |
|               |                        | Acidified-Heated | 17979               | 33.03                       | 1.83                                    |
| Mollusca      | 57399                  | Control          | 13120               | 22.86                       | 1.00                                    |
|               |                        | Acidified        | 5526                | 9.63                        | 0.42                                    |
|               |                        | Heated           | 25929               | 45.17                       | 1.98                                    |
|               |                        | Acidified-Heated | 12824               | 22.34                       | 0.98                                    |
| Porifera      | 58051                  | Control          | 19886               | 34.26                       | 1.00                                    |
|               |                        | Acidified        | 12582               | 21.67                       | 0.63                                    |
|               |                        | Heated           | 16508               | 28.44                       | 0.83                                    |
|               |                        | Acidified-Heated | 9075                | 15.63                       | 0.46                                    |
| Rhodophyta    | 15314                  | Control          | 3825                | 24.98                       | 1.00                                    |
|               |                        | Acidified        | 155                 | 1.01                        | 0.04                                    |
|               |                        | Heated           | 3542                | 23.13                       | 0.93                                    |
|               |                        | Acidified-Heated | 7792                | 50.88                       | 2.04                                    |

**Table S12.** Proportion of MOTUs within each treatment relative to the Control condition.

| Phylum        | Total MOTUs per Phylum | Treatment        | MOTUs per Treatment | Relative Abundance of MOTUs | Proportion of MOTUs Relative to Control |
|---------------|------------------------|------------------|---------------------|-----------------------------|-----------------------------------------|
| Annelida      | 73                     | Control          | 47                  | 64.38                       | 1.00                                    |
|               |                        | Acidified        | 28                  | 38.36                       | 0.60                                    |
|               |                        | Heated           | 56                  | 76.71                       | 1.19                                    |
|               |                        | Acidified-Heated | 46                  | 63.01                       | 0.98                                    |
| Arthropoda    | 66                     | Control          | 33                  | 50.00                       | 1.00                                    |
|               |                        | Acidified        | 31                  | 46.97                       | 0.94                                    |
|               |                        | Heated           | 41                  | 62.12                       | 1.24                                    |
|               |                        | Acidified-Heated | 38                  | 57.58                       | 1.15                                    |
| Cnidaria      | 19                     | Control          | 10                  | 52.63                       | 1.00                                    |
|               |                        | Acidified        | 6                   | 31.58                       | 0.60                                    |
|               |                        | Heated           | 12                  | 63.16                       | 1.20                                    |
|               |                        | Acidified-Heated | 8                   | 42.11                       | 0.80                                    |
| Echinodermata | 11                     | Control          | 10                  | 90.91                       | 1.00                                    |
|               |                        | Acidified        | 11                  | 100.00                      | 1.10                                    |
|               |                        | Heated           | 11                  | 100.00                      | 1.10                                    |
|               |                        | Acidified-Heated | 10                  | 90.91                       | 1.00                                    |
| Mollusca      | 24                     | Control          | 15                  | 62.50                       | 1.00                                    |
|               |                        | Acidified        | 13                  | 54.17                       | 0.87                                    |
|               |                        | Heated           | 22                  | 91.67                       | 1.47                                    |
|               |                        | Acidified-Heated | 13                  | 54.17                       | 0.87                                    |
| Porifera      | 41                     | Control          | 18                  | 43.90                       | 1.00                                    |
|               |                        | Acidified        | 20                  | 48.78                       | 1.11                                    |
|               |                        | Heated           | 29                  | 70.73                       | 1.61                                    |
|               |                        | Acidified-Heated | 19                  | 46.34                       | 1.06                                    |
| Rhodophyta    | 32                     | Control          | 17                  | 53.13                       | 1.00                                    |
|               |                        | Acidified        | 5                   | 15.63                       | 0.29                                    |
|               |                        | Heated           | 25                  | 78.13                       | 1.47                                    |
|               |                        | Acidified-Heated | 19                  | 59.38                       | 1.12                                    |

**Table S13.** A two-way permutational ANOVA on the effects of elevated temperature (T), acidification (A) and their interaction (T x A) on the top 7 phyla.

| Phylum        | Factors   | Df | SS     | MS     | F    | Pr(>F)      |
|---------------|-----------|----|--------|--------|------|-------------|
| Annelida      | T         | 1  | 12.75  | 12.75  | 1.68 | 0.20        |
|               | A         | 1  | 0.27   | 0.27   | 0.04 | 0.87        |
|               | T x A     | 1  | 0.05   | 0.05   | 0.01 | 0.94        |
|               | Residuals | 16 | 121.01 | 7.56   |      |             |
| Arthropoda    | T         | 1  | 1.03   | 1.03   | 0.07 | 0.79        |
|               | A         | 1  | 59.11  | 59.141 | 4.34 | <b>0.05</b> |
|               | T x A     | 1  | 12.68  | 12.68  | 0.93 | 0.37        |
|               | Residuals | 16 | 217.99 | 13.62  |      |             |
| Cnidaria      | T         | 1  | 2.02   | 2.02   | 0.05 | 0.84        |
|               | A         | 1  | 4.47   | 4.47   | 0.11 | 0.76        |
|               | T x A     | 1  | 0.02   | 0.02   | 0.00 | 0.98        |
|               | Residuals | 16 | 655.69 | 40.98  |      |             |
| Echinodermata | T         | 1  | 7.65   | 7.65   | 0.70 | 0.41        |
|               | A         | 1  | 89.35  | 89.35  | 8.22 | <b>0.01</b> |
|               | T x A     | 1  | 0.22   | 0.22   | 0.02 | 0.87        |
|               | Residuals | 16 | 176.86 | 10.87  |      |             |
| Mollusca      | T         | 1  | 64.99  | 64.99  | 3.41 | 0.11        |
|               | A         | 1  | 61.42  | 61.41  | 3.22 | 0.11        |
|               | T x A     | 1  | 4.60   | 4.60   | 0.24 | 0.66        |
|               | Residuals | 16 | 304.99 | 19.06  |      |             |
| Porifera      | T         | 1  | 7.04   | 7.04   | 0.24 | 0.70        |
|               | A         | 1  | 32.35  | 32.35  | 1.08 | 0.34        |
|               | T x A     | 1  | 0      | 0.00   | 0.00 | 0.99        |
|               | Residuals | 16 | 477.63 | 29.85  |      |             |
| Rhodophyta    | T         | 1  | 115.24 | 115.24 | 3.34 | 0.08        |
|               | A         | 1  | 0.74   | 0.74   | 0.02 | 0.89        |
|               | T x A     | 1  | 134.31 | 134.21 | 3.89 | 0.06        |
|               | Residuals | 16 | 552.32 | 34.52  |      |             |

Permutations = 999, Df = degrees of freedom, SS = sum of squares, MS = mean squares, F = the F-value, and P = the probability. Bolded p-values indicates significance at  $p < 0.05$  and gray values represent  $p < 0.1$

**Table S14.** A two-way permutational ANOVA on the effects of elevated temperature (T), acidification (A) and their interaction (T x A) on the top 8 families.

| Phylum        | Family       | Factors   | Df | SS      | MS     | F     | Pr(>F)          |
|---------------|--------------|-----------|----|---------|--------|-------|-----------------|
| Annelida      | Amphinomidae | T         | 1  | 10.76   | 10.76  | 0.23  | 0.61            |
|               |              | A         | 1  | 51.18   | 51.17  | 1.07  | 0.34            |
|               |              | T x A     | 1  | 18.39   | 18.39  | 0.38  | 0.56            |
|               |              | Residuals | 16 | 760.73  | 47.55  |       |                 |
|               | Cirratulidae | T         | 1  | 2.79    | 2.79   | 0.04  | 0.89            |
|               |              | A         | 1  | 364.99  | 364.99 | 4.79  | <b>0.02</b>     |
|               |              | T x A     | 1  | 20.83   | 20.82  | 0.27  | 0.60            |
|               |              | Residuals | 16 | 1218.49 | 76.16  |       |                 |
| Arthropoda    | Gammaridae   | T         | 1  | 7.614   | 7.61   | 0.56  | 0.49            |
|               |              | A         | 1  | 154.94  | 154.94 | 11.43 | <b>&lt;0.01</b> |
|               |              | T x A     | 1  | 2.77    | 2.77   | 0.20  | 0.68            |
|               |              | Residuals | 16 | 216.92  | 13.56  |       |                 |
| Echinodermata | Amphiuridae  | T         | 1  | 11.34   | 11.34  | 0.68  | 0.43            |
|               |              | A         | 1  | 51.48   | 51.48  | 3.10  | 0.09            |
|               |              | T x A     | 1  | 2.05    | 2.05   | 0.12  | 0.71            |
|               |              | Residuals | 16 | 265.45  | 16.59  |       |                 |
|               | Ophiactidae  | T         | 1  | 46.82   | 46.82  | 1.99  | 0.18            |
|               |              | A         | 1  | 120.27  | 120.27 | 5.11  | <b>0.04</b>     |
|               |              | T x A     | 1  | 3.02    | 3.02   | 0.13  | 0.73            |
|               |              | Residuals | 16 | 376.63  | 23.54  |       |                 |
| Mollusca      | Hipponicidae | T         | 1  | 7.79    | 7.79   | 0.24  | 0.63            |
|               |              | A         | 1  | 197.39  | 197.39 | 6.12  | <b>0.02</b>     |
|               |              | T x A     | 1  | 8.12    | 8.12   | 0.25  | 0.61            |
|               |              | Residuals | 16 | 516.34  | 32.27  |       |                 |
|               | Vermetidae   | T         | 1  | 137.13  | 137.13 | 4.88  | <b>0.05</b>     |
|               |              | A         | 1  | 40.32   | 40.32  | 1.44  | 0.23            |
|               |              | T x A     | 1  | 10.05   | 10.05  | 0.36  | 0.56            |
|               |              | Residuals | 16 | 449.18  | 28.07  |       |                 |
| Porifera      | Suberitidae  | T         | 1  | 114.31  | 114.31 | 3.75  | 0.06            |
|               |              | A         | 1  | 7.84    | 7.84   | 0.26  | 0.60            |
|               |              | T x A     | 1  | 14.46   | 14.46  | 0.47  | 0.50            |
|               |              | Residuals | 16 | 487.39  | 30.46  |       |                 |

Permutations = 999, Df = degrees of freedom, SS = sum of squares, MS = mean squares, F = the F-value, and P = the probability. Bolded p-values indicates significance at  $p < 0.05$  and gray values represent  $p < 0.1$
